# Supplementary material for: Biological Effects of BET Inhibition by OTX015 (MK-8628) and JQ1 in NPM1-Mutated (NPM1c) Acute Myeloid Leukemia (AML)
Source: MDPI journal article supplement (doi:10.3390/biomedicines9111704), 2021-11-17
Supplement: s1 [file s1]

## Supplementary Figure Legends

**Supplementary Figure S1: Dose response curves for ATO+ATRA and BETi in *NPM1c* cell lines and the *NPM1wt* cell line K562.** Cell lines were exposed for 72h to increasing doses of indicated drugs and *ApoTox-Glo*<sup>TM</sup> assays were performed to determine IC50 of the cell lines. X-axis: log of drug doses used, Y-axis: percent of cells. Values are means of 3. Three independent experiments were run for each cell line.

**Supplementary Figure S2: Differentiation patterns of OCI-AML3 and IMS-M2 cell lines after exposure to BETi compared to ATO+ATRA.** Histograms of CD11b as detected by flowcytometry using a human CD11b-specific mouse monoclonal antibody on OCI-AML3 and IMS-M2 cells treated for 48-72h either with 0.1% DMSO, 1000nM ATO+1000nM ATRA, 500nM OTX015 (MK-8628) or 500nM JQ1. Results from one representative experiment of three independent experiments are shown.

**Supplementary Figure S3: Exposure of the *NPM1wt* K562 cell line to ATO+ATRA and BETi.** (A) K562 cells were exposed 48-72h either to 0.1% DMSO, 1000nM ATO+1000nM ATRA, 500nM OTX015 (MK-8628) or 500nM JQ1. Apoptosis was detected with annexin V and PI by using flow cytometry. Apoptotic cells were defined as annexin V+ with or without PI uptake. Results are shown as mean +/- SEM from duplicates of three independent experiments. (B) The expression of the differentiation marker CD11b was detected by flowcytometry using a human CD11b-specific mouse monoclonal antibody on K562 cells treated for 48-72h either with 0.1% DMSO, 1000nM ATO+1000nM ATRA, 500nM OTX015 (MK-8628) or 500nM JQ1. Results are shown as mean +/- SEM from duplicates of three independent experiments. (C) Cell morphology of K562 after treatment either with 0.1% DMSO, 1000nM ATO+1000nM ATRA, 500nM OTX015 (MK-8628) or 500nM JQ1 was studied at 48h by May-Grünwald-Giemsa staining after cytopsin. Experiments were performed as triplicates.

**Supplementary Figure S4: ATO+ATRA and BETi induced *NPM1c* protein degradation with or without bortezomib.** (A) Densitometry of protein changes of WB shown in **Figure 3 A**. (B) OCI-AML3 cells were exposed 48h either to 0.1% DMSO or 1000nM ATO+1000nM ATRA in the presence or absence of 10nM of the proteasome inhibitor PS341 (bortezomib). Western blot showing protein changes of *NPM1c* oncoprotein and total *NPM1* protein by using appropriate antibodies were performed. Vinculin was used as loading control. One representative experiment out of three is shown. (C) Duolink<sup>®</sup> in situ proximity ligation assay performed in OCI-AML3 cells. As observed by IF microscopy *NPM1c* interacts in the cytosol

with ubiquitin (red dots) upon exposure with 1000nM ATO+1000nM ATRA, 500nM OTX015 (MK-8628) or 500nM JQ1. 0.1% DMSO induced no interaction with ubiquitin.

**Supplementary Figure S5: Exposure to OTX015 (MK-8628) and JQ1 induced NPM1c disappearance in the cytosol of IMS-M2 cells.** Confocal immunofluorescence microscopy for cellular localization of NPM1 (wt+c) was performed after 48h exposure either to 0.1% DMSO, 1000nM ATO+1000nM ATRA, 500nM OTX015 or 500nM JQ1. Cells were stained with an antibody recognizing NPM (wt+c) (green) and nuclei are labeled blue by DAPI. One representative experiment out of three is shown. K562 NPM1wt served as negative control.

**Supplementary Figure S6: Significant down regulation of the BRD signature in *NPM1c* OCI-AML3 and IMS-M2 cell lines.** GeneChip Human Transcriptome Array HTA 2.0 (Affymetrix®) was performed for OCI-AML3 and IMS-M2 cell lines. Experiments were performed as triplicates. GSEA plots of the specific *BRD* signature<sup>14</sup> of cells either treated with 500nM OTX015 or 500nM JQ1 compared with 0.1% DMSO; NES, normalized enrichment score.
