# Supplementary material for: Biological Effects of BET Inhibition by OTX015 (MK-8628) and JQ1 in NPM1-Mutated (NPM1c) Acute Myeloid Leukemia (AML)
Source: MDPI journal article supplement (doi:10.3390/biomedicines9111704), 2021-11-17

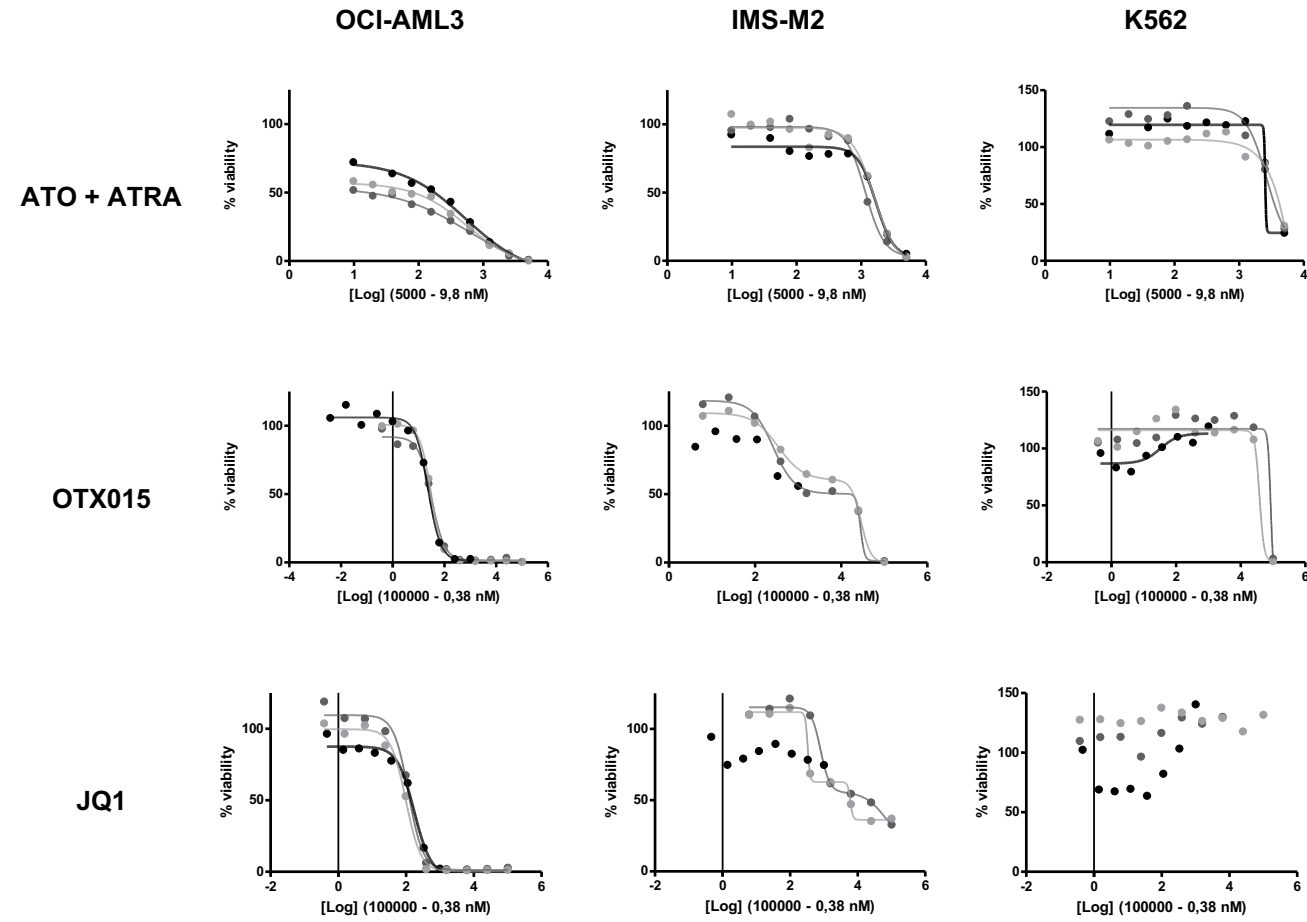

**Supplementary Figure S1**

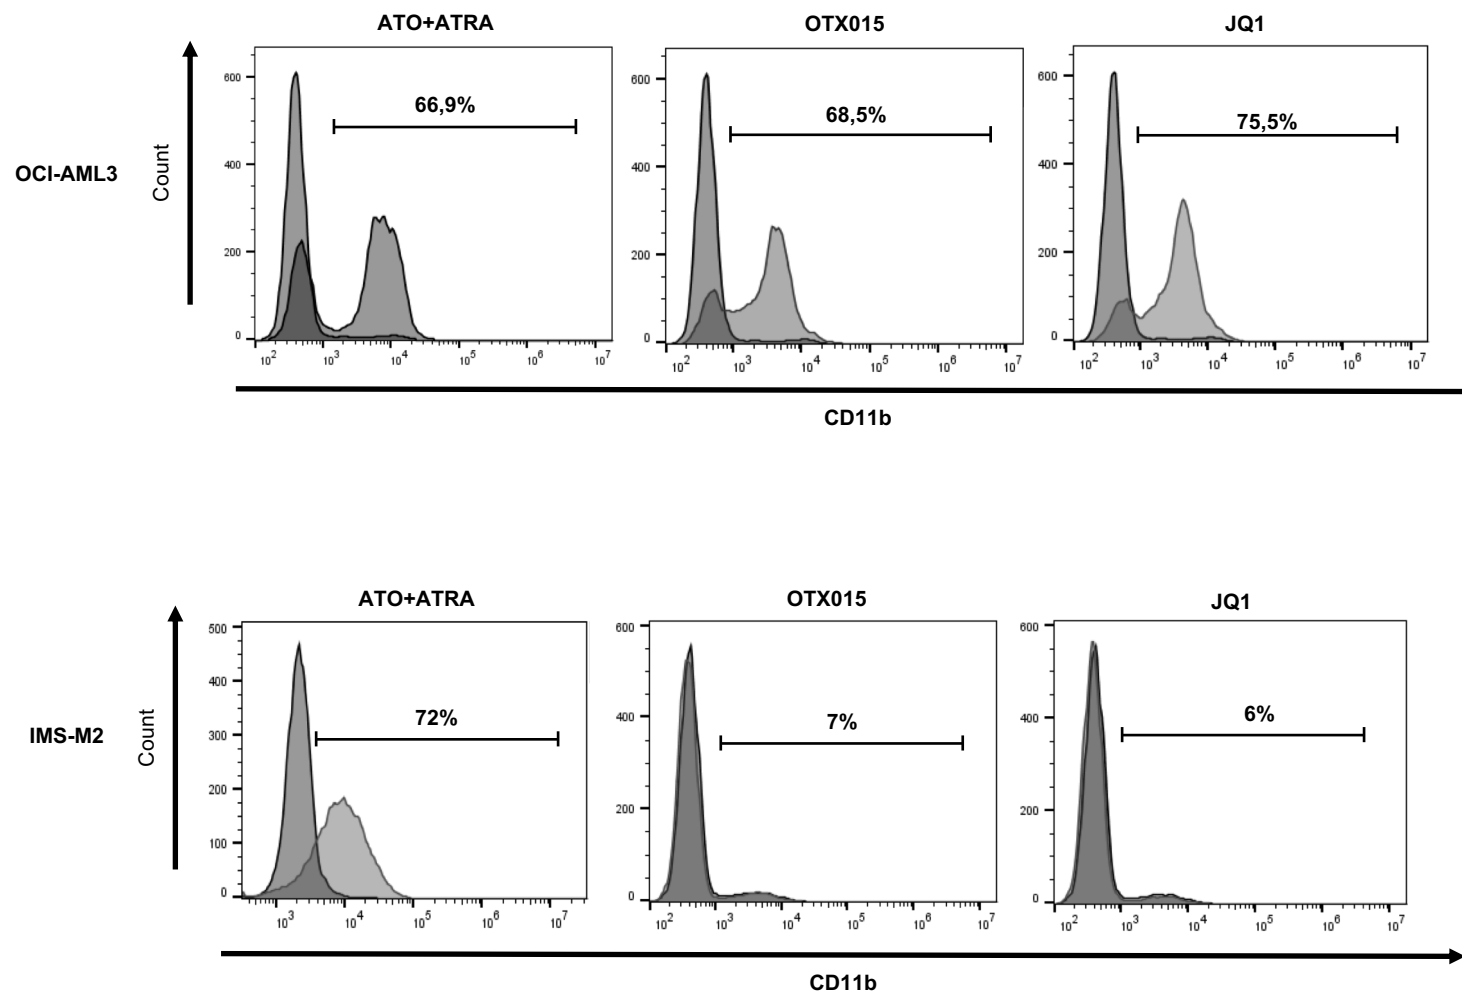

**Supplementary Figure S2**



**A**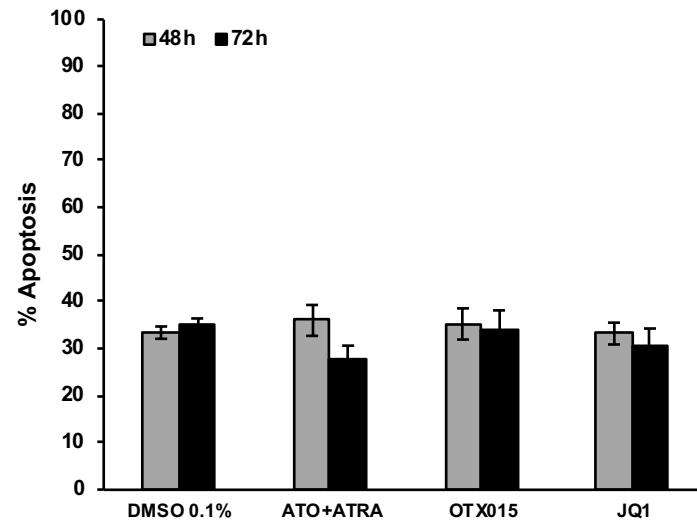**B**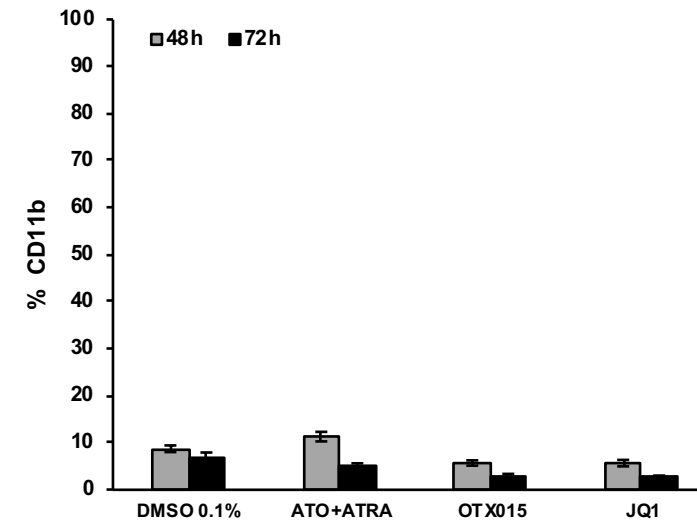**C**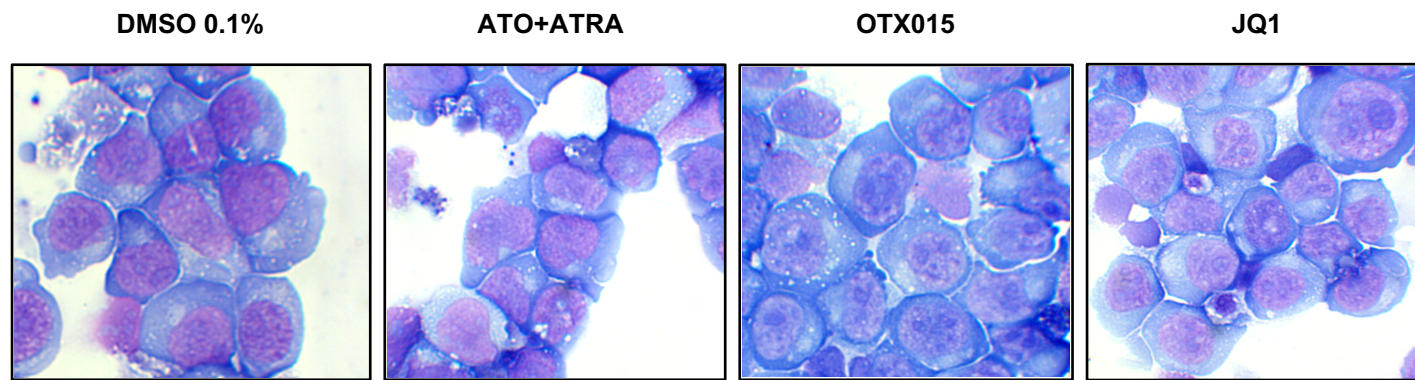

**A**

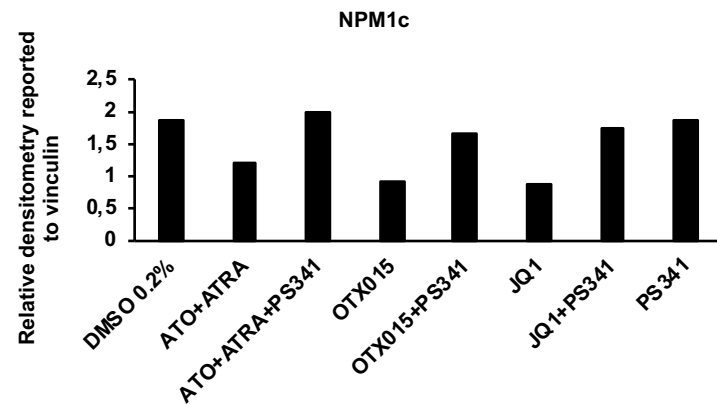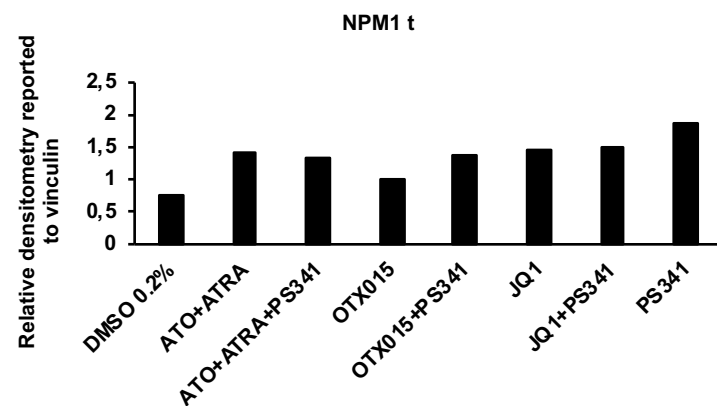

**B**

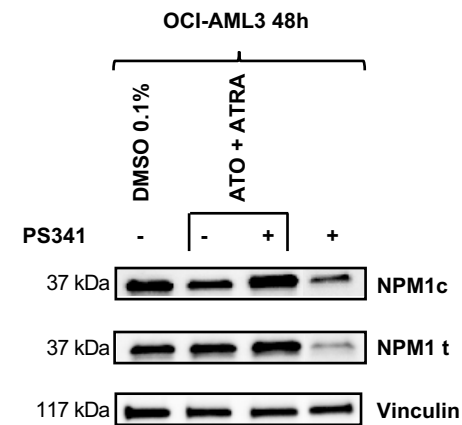

**C**

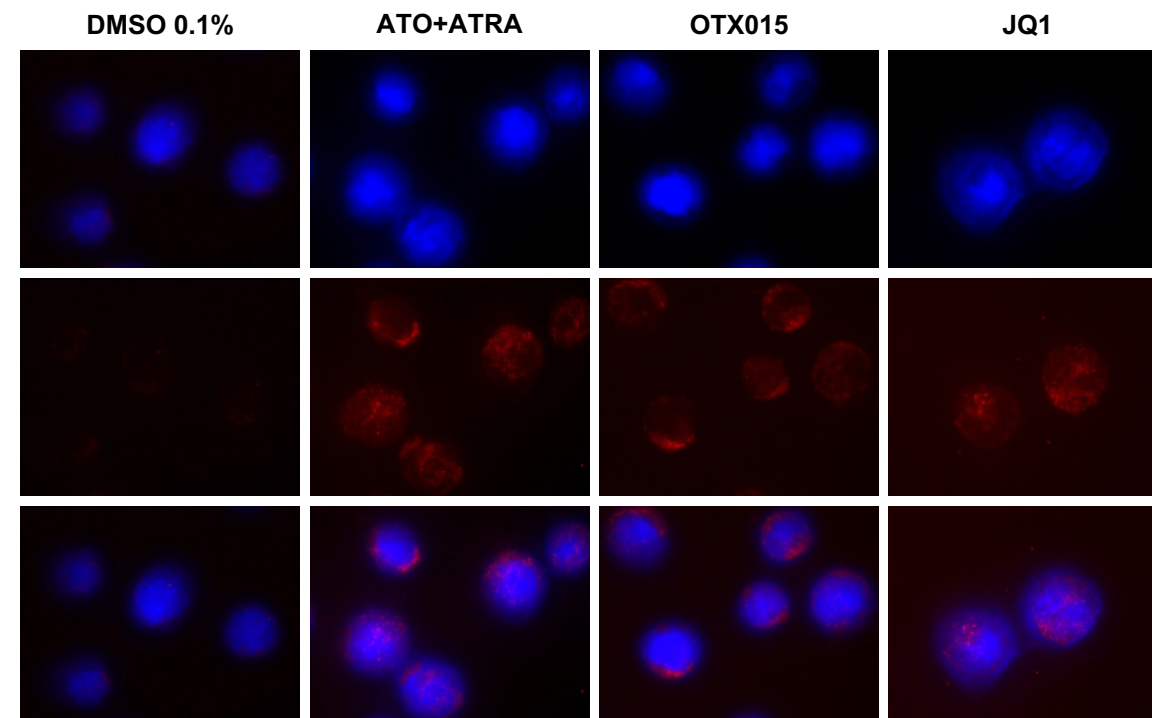

**Supplementary Figure S4**

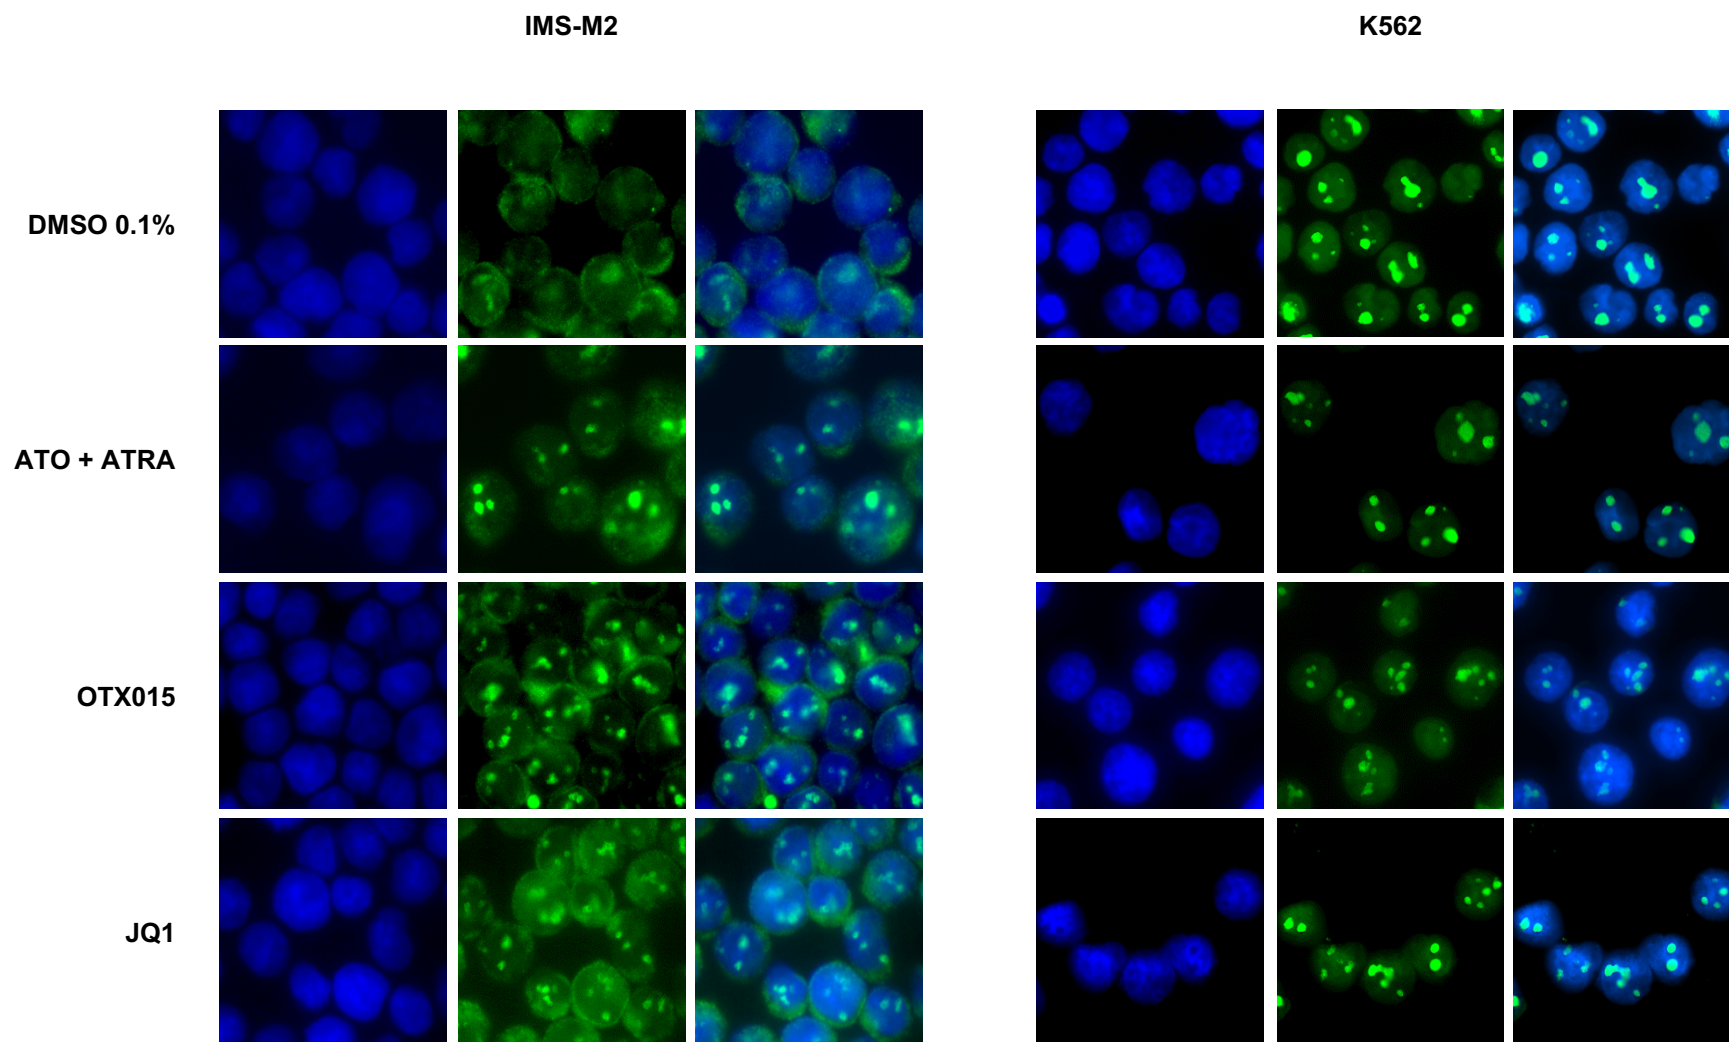

Supplementary Figure S5

OCI-AML3

DMSO VS OTX015

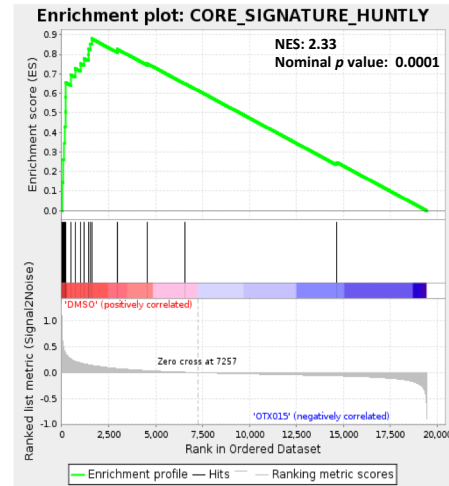

DMSO VS JQ1

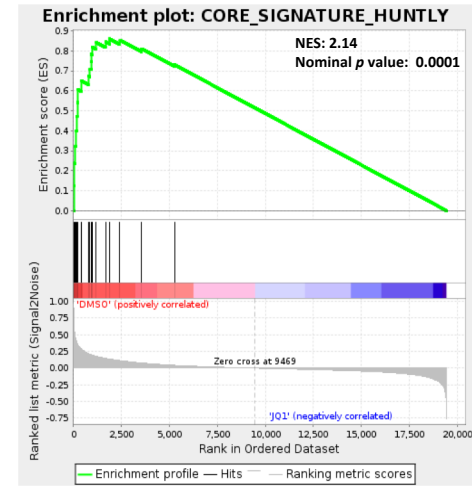

IMS-M2

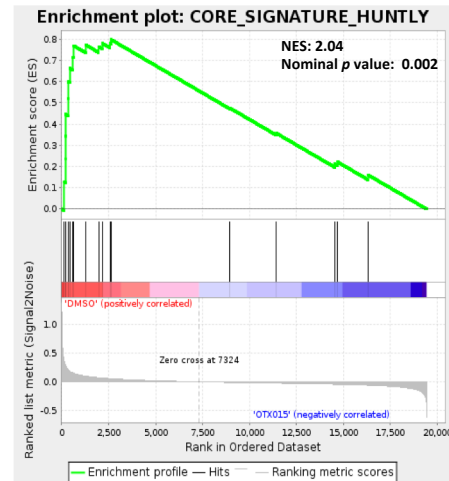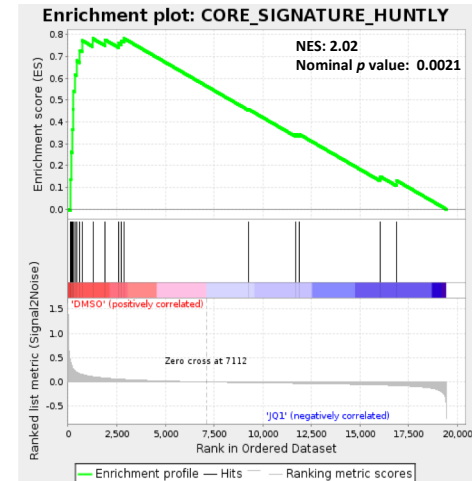

Supplement: s1 [file s1]
